# Supplementary material for: Identification of Cell-Attachment Factors Derived from Green Algal Cells Disrupted by Sonication in Fabrication of Cell Plastics
Source: MDPI journal article supplement (doi:10.3390/bioengineering10080893), 2023-07-27
Supplement: s1 [file s1]

## Supplementary Materials

**Table S1.** Highly appeared proteins in purified intermediate

| No. | Accession number | Fold-chage (B/A) | Protein name                                     | EC number | Total number of amino acids | Location                                                                     |
|-----|------------------|------------------|--------------------------------------------------|-----------|-----------------------------|------------------------------------------------------------------------------|
| 1   | A0A2K3DT53       | 83.62            | Sulfatase domain-containing protein              | -         | 688                         | -                                                                            |
| 2   | A0A2K3DGS6       | 81.90            | Repressor of RNA polymerase III transcription    | -         | 235                         | Nucleus                                                                      |
| 3   | A0A2K3E455       | 81.51            | UBC core domain-containing protein               | -         | 163                         | Nucleus                                                                      |
| 4   | A0A2K3CSD3       | 65.07            | DUF4347 domain-containing protein                | -         | 587                         | -                                                                            |
| 5   | A0A2K3DK02       | 41.65            | Protein kinase domain-containing protein         | 2.7.1.171 | 1428                        | Actin filament                                                               |
| 6   | A0A2K3DX97       | 35.74            | BTB domain-containing protein                    | -         | 801                         | Cytoplasm                                                                    |
| 7   | A0A2K3DM36       | 32.81            | Ferredoxin--NADP(+) reductase                    | -         | 83                          | -                                                                            |
| 8   | A0A2K3DVE0       | 32.51            | C3H1-type domain-containing protein              | -         | 868                         | -                                                                            |
| 9   | A0A2K3DZT1       | 31.27            | Hydrolase_4 domain-containing protein            | -         | 411                         | -                                                                            |
| 10  | A0A2K3E279       | 30.89            | SRCR domain-containing protein                   | -         | 1350                        | Membrane                                                                     |
| 11  | A0A2K3E877       | 27.99            | Guanylate cyclase domain-containing protein      | 2.7.7.65  | 2854                        | -                                                                            |
| 12  | A0A2K3CPF2       | 27.96            | PUM-HD domain-containing protein                 | -         | 1846                        | Membrane                                                                     |
| 13  | A0A2K3DMR1       | 27.65            | DUF952 domain-containing protein                 | -         | 141                         | -                                                                            |
| 14  | A0A2K3CPT2       | 26.21            | Non-specific serine/threonine protein kinase     | 2.7.11.1  | 1590                        | Membrane                                                                     |
| 15  | A0A2K3E5V4       | 26.11            | No exine formation 1                             | -         | 1200                        | Membrane                                                                     |
| 16  | A0A2K3DGJ3       | 25.87            | Rab3 GTPase-activating protein catalytic subunit | -         | 395                         | -                                                                            |
| 17  | A0A2K3DYL9       | 25.51            | ANAPC4_WD40 domain-containing protein            | -         | 659                         | Nucleus                                                                      |
| 18  | A8I3A7           | 25.48            | Small ubiquitin-related modifier                 | -         | 97                          | Nucleus                                                                      |
| 19  | A0A2K3E6F6       | 22.68            | Histone acetyltransferase                        | 2.3.1.48  | 1160                        | Nucleus                                                                      |
| 20  | A8HY76           | 21.14            | Hydroxyethylthiazole kinase                      | 2.7.1.50  | 277                         | -                                                                            |
| 21  | A0A2K3DJL8       | 20.01            | RRM domain-containing protein                    | -         | 734                         | Commitment complex, nuclear speck, U2-type prespliceosome , U2AF complex     |
| 22  | A0A2K3D8H7       | 19.32            | Uncharacterized protein                          | -         | 329                         | -                                                                            |
| 23  | A0A2K3CTV5       | 19.31            | Snurportin-1                                     | -         | 598                         | Nucleus, Cytoplasm                                                           |
| 24  | A8IBP0           | 18.28            | Serine/threonine-protein phosphatase             | 3.1.3.16  | 314                         | Cytosol                                                                      |
| 25  | A0A2K3DQ06       | 17.95            | DIOX_N domain-containing protein                 | -         | 451                         | -                                                                            |
| 26  | A0A2K3DWW3       | 17.14            | CLP1_P domain-containing protein                 | -         | 735                         | Nucleus                                                                      |
| 27  | A8HXV4           | 16.98            | Uncharacterized protein                          | -         | 681                         | Cytosol, colgi membrane, Ric1-Rgp1 guanyl-nucleotide exchange factor complex |
| 28  | A0A2K3DQT5       | 16.84            | Fibronectin type-III domain-containing protein   | -         | 486                         | -                                                                            |
| 29  | A0A2K3DKZ4       | 16.63            | PseudoU_synth_2 domain-containing protein        | -         | 926                         | -                                                                            |
| 30  | A0A2K3CQT5       | 16.19            | Protein kinase domain-containing protein         | 2.7.1.171 | 4006                        | Membrane                                                                     |
| 31  | A0A2K3DWR3       | 15.82            | Phosphoglycerate mutase family protein           | 5.4.2.4   | 304                         | -                                                                            |
| 32  | A0A2K3DQ81       | 15.62            | Trafficking protein particle complex subunit     | -         | 126                         | Endoplasmic reticulum, Golgi apparatus, cis-Golgi network                    |
| 33  | A0A2K3E0F7       | 15.20            | DIOX_N domain-containing protein                 | -         | 321                         | -                                                                            |
| 34  | A0A0U2Q5E3       | 14.57            | NER endonuclease                                 | -         | 2463                        | Nucleus                                                                      |
| 35  | A8IZN1           | 14.57            | Uncharacterized protein                          | -         | 867                         | Cell periphery, endoplasmic reticulum, membrane                              |
| 36  | A0A2K3CXS9       | 14.46            | Uncharacterized protein                          | -         | 138                         | -                                                                            |
| 37  | A0A2K3E0I5       | 14.39            | TFIIS central domain-containing protein          | -         | 1373                        | Nucleus                                                                      |
| 38  | A8JHA7           | 14.21            | Uncharacterized protein                          | -         | 145                         | -                                                                            |
| 39  | A0A2K3DDC7       | 14.04            | SpoU_methylase domain-containing protein         | -         | 304                         | -                                                                            |
| 40  | A8I202           | 13.60            | Uncharacterized protein                          | -         | 269                         | Endomembrane system, SNARE complex                                           |
| 41  | A0A2K3CTM8       | 13.57            | CYTH domain-containing protein                   | -         | 275                         | -                                                                            |
| 42  | A0A2K3DU48       | 13.50            | MMS1_N domain-containing protein                 | -         | 427                         | -                                                                            |
| 43  | A0A2K3E7Z1       | 13.06            | RanBD1 domain-containing protein                 | -         | 572                         | -                                                                            |
| 44  | A0A2K3DW99       | 12.68            | HECT-type E3 ubiquitin transferase               | 2.3.2.26  | 1291                        | -                                                                            |
| 45  | A8HQM9           | 12.59            | Uncharacterized protein                          | -         | 353                         | Endoplasmic reticulum                                                        |
| 46  | A0A2K3D5Q4       | 11.54            | Lactamase_B domain-containing protein            | -         | 272                         | -                                                                            |
| 47  | A0A2K3D7I1       | 10.32            | Cytochrome P450                                  | 1.6.2.4   | 561                         | Membrane                                                                     |
| 48  | A0A2K3D7M1       | 10.03            | ANK_REP_REGION domain-containing protein         | -         | 557                         | Membrane                                                                     |
| 49  | A0A2K3E0X7       | 10.02            | Sulfatase domain-containing protein              | -         | 1036                        | -                                                                            |

Forty-nine proteins grouped in Cluster No. 2, which were 10 times larger the protein intensities of the purified intermediate divided by those of the cell-content, were displayed. Fold change: Values of averaged protein-intensity in intermediate after hexane-purification / averaged protein-intensity in cell-contents without hexane-purification.
